# Supplementary material
Source: PubMed Central journal article supplement (PMC3228526)
Supplement: supp_mol.111.071993_71993Supplementary_1_new.pdf [file supp_mol.111.071993_71993Supplementary_1_new.pdf]

# Supplementary Figure 1

## p38 MAP kinase- $\gamma$ inhibition by long-acting $\beta_2$ adrenergic agonists reversed steroid insensitivity in severe asthma

Nicholas Mercado, Yasuo To, Yoshiki Kobayashi, Ian M. Adcock, Peter J. Barnes, and Kazuhiro Ito

Molecular Pharmacology

### Effects of Formoterol and SB203580 on phosphorylation of GR, p38MAPK $\gamma$ and HSP27 in PBMC treated with IL-2 and IL-4

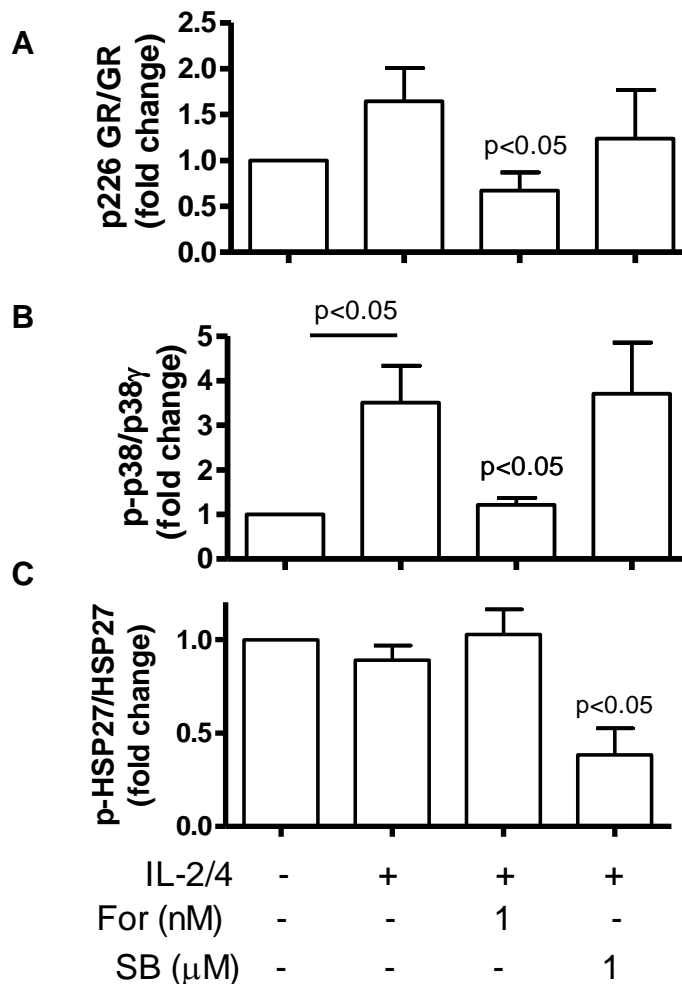

PBMCs obtained from healthy subjects were treated with IL-2/IL-4 for 48 hours, and then incubated with formoterol (For: 1nM) or SB203580 (SB: 1 $\mu$ M) for 20 min. Cells were collected and phospho-HSP27, GR, p38MAPK $\gamma$  and total HSP27, GR, p38MAPK $\gamma$  have been visualized by SDS-PAGE/Western blotting. Band densities were analysed and the ratio of phospho-protein vs. total protein was determined in each protein in each experiment. Y axis is shown as fold change vs. non-treatment cells. P < 0.05 vs. IL2/4 control. Panel A: phospho GR at Ser226/GR Panel B: phospho-p38MAPK $\gamma$  /p38MAPK $\gamma$  Panel C: phospho-HSP27/HSP27 N=6
