# Supplementary material
Source: PubMed Central journal article supplement (PMC3228526)
Supplement: supp_mol.111.071993_71993Supplementary_Fig3.pdf [file supp_mol.111.071993_71993Supplementary_Fig3.pdf]

# Supplementary Figure 3

## p38 MAP kinase- $\gamma$ inhibition by long-acting $\beta_2$ adrenergic agonists reversed steroid insensitivity in severe asthma

Nicholas Mercado, Yasuo To, Yoshiki Kobayashi, Ian M. Adcock, Peter J. Barnes, and Kazuhiro Ito

Molecular Pharmacology

### Effects of overexpression of p38MAPK $\gamma$

A

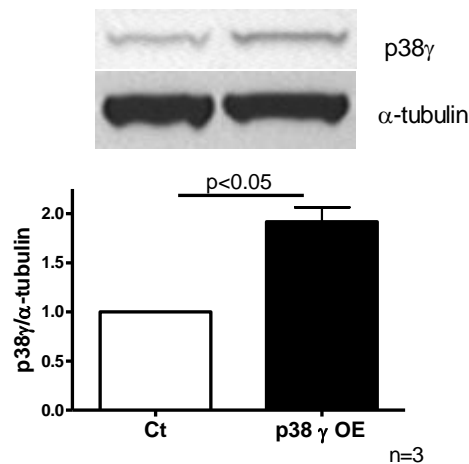

B

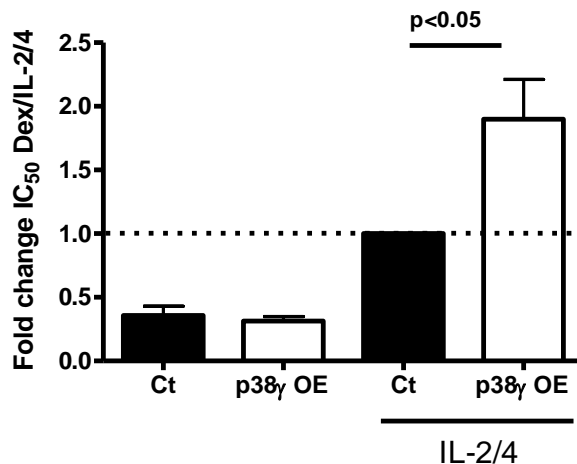

U937 cells were transfected with either 2  $\mu$ g of empty vector control (Ct) or with p38 gamma vector (p38 $\gamma$  overexpression: p38 $\gamma$  OE) with nucleofector (Amaxa) for 24hrs, and then incubated in 10% FCS RPMI1640 media for 24 hours with/without IL-2/4 stimulation. Cells were collected, treated with Dex ( $10^{-11}$  to  $10^{-6}$ M) for 40 minutes followed by stimulation with TNF (10ng/ml) for 8 hours. Supernatant was collected and IL-8 level was determined by ELISA. IC<sub>50</sub> values of dexamethasone on TNF $\alpha$ -induced IL-8 release was also calculated. N=3
