# Supplementary material
Source: PubMed Central journal article supplement (PMC3228526)
Supplement: supp_mol.111.071993_71993Supplementary_Fig_2.pdf [file supp_mol.111.071993_71993Supplementary_Fig_2.pdf]

# Supplementary Figure 2

## p38 MAP kinase- $\gamma$ inhibition by long-acting $\beta_2$ adrenergic agonists reversed steroid insensitivity in severe asthma

Nicholas Mercado, Yasuo To, Yoshiki Kobayashi, Ian M. Adcock, Peter J. Barnes, and Kazuhiro Ito

Molecular Pharmacology

### Protein expression of p38MAPK $\gamma$ in PBMCs from healthy subjects and severe asthma

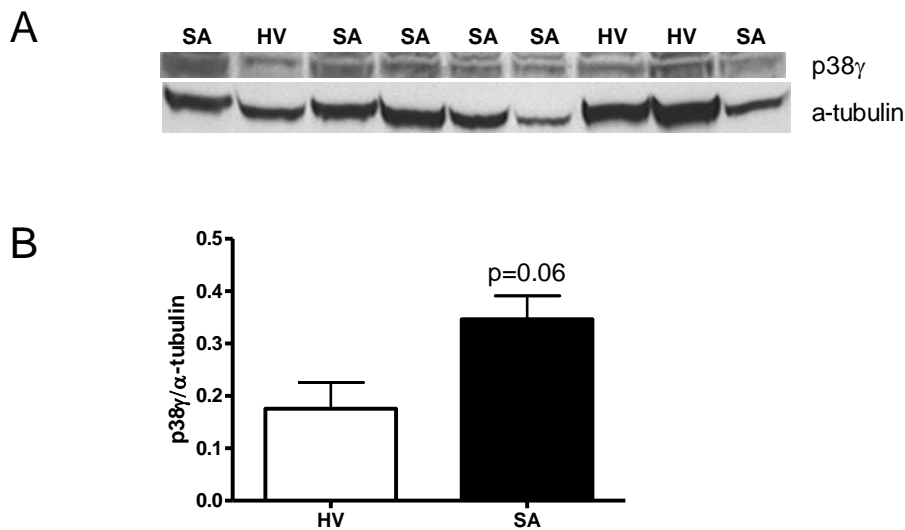

Total cell extracts of PBMCs were prepared and the protein was separated by SDS-PAGE. p38MAPK $\gamma$  and  $\alpha$ -tubulin were detected by western blotting (Panel A). p38MAPK $\gamma$  expression in PBMCs in healthy volunteers (HV, n=4) and patients with severe asthma (SA, n=6) were shown in the panel A, and results are expressed as means  $\pm$  standard error of the mean (SEM) (panel B).
